# Supplementary material
Source: PubMed Central journal article supplement (PMC3322220)
Supplement: mmc1.pdf [file mmc1.pdf]

## Supplemental Data

### Mutations in *ROGDI* Cause Kohlschütter-Tönz Syndrome

Anna Schossig, Nicole I. Wolf, Christine Fischer, Maria Fischer, Gernot Stocker, Stephan Pabinger, Andreas Dander, Bernhard Steiner, Otmar Tönz, Dieter Kotzot, Edda Haberlandt, Albert Amberger, Barbara Burwinkel, Katharina Wimmer, Christine Fauth, Caspar Grond-Ginsbach, Martin J. Koch, Annette Deichmann, Christof von Kalle, Claus R. Bartram, Alfried Kohlschütter, Zlatko Trajanoski, and Johannes Zschocke

Table S1. Autozygous Regions in Family A

| Chromosome    | Flanking SNPs        | Size                 | Number of Protein Coding Genes |
|---------------|----------------------|----------------------|--------------------------------|
| 3q13.31       | rs2134655- rs2866121 | 4,561,887 bp         | 33                             |
| 11q24.1-q24.2 | rs763640- rs718520   | 1,420,060 bp         | 64                             |
| 16p13.3       | rs2107321- rs1424125 | 3,255,290 bp         | 104                            |
| 17q25.1-q25.3 | rs718072-rs2045660   | 6,592,024 bp         | 125                            |
| <b>Total</b>  |                      | <b>15,829,261 bp</b> | <b>326</b>                     |

Table S2. Summary of the Filtering Steps Used to Reduce the Number of Candidate Variants

| <b>Description</b>                                  | <b># of Variants</b> | <b>Genes</b>                                |
|-----------------------------------------------------|----------------------|---------------------------------------------|
| total SNPs                                          | 20454                |                                             |
| total DIPs                                          | 1208                 |                                             |
| total Variants                                      | 21662                |                                             |
| <b>auto_annovar</b>                                 |                      |                                             |
| Remove synonymous and non-frameshift variants       | 9970                 |                                             |
| Remove conserved variants from 44-species alignment | 4711                 |                                             |
| Remove variants in segmental duplication regions    | 4164                 |                                             |
| Remove variants in 1000 genomes Project (2010_11)   | 913                  |                                             |
| Remove variants in dbSNP build 132                  | 791                  |                                             |
| <b>Region of interest</b>                           |                      |                                             |
| chr13 (113.858.201-118.420.088)                     | 0                    |                                             |
| chr11 (123.846.833-125.266.893)                     | 0                    |                                             |
| chr16 (2.807.263-6.062.553)                         | 2                    | <i>ROGDI, CREBBP</i>                        |
| chr17 (70.584.327-77.176.351)                       | 5                    | <i>SLC39A11, ITGB4, EVPL, MGAT5B, USP36</i> |
| <b>Remove heterozygous variants</b>                 |                      |                                             |
| chr16 (2.807.263-6.062.553)                         | 1                    | <i>ROGDI</i>                                |
| chr17 (70.584.327-77.176.351)                       | 1                    | <i>EVPL</i>                                 |

Table S3. Sequences of Primers Used for Genomic PCR Amplification of *ROGDI*

| <b>Exons</b>      | <b>Primers (including universal M13 sequences in lower case)</b> |
|-------------------|------------------------------------------------------------------|
| 1_2 fw.           | gtaaaacgacggccagtCAGTCTGGTTCCAGGGCTC                             |
| 1_2 rv.           | caggaaacagctatgacGAGCCAGGGAAATGAGGAG                             |
| 3_4 fw.           | gtaaaacgacggccagtGGCTTCTGGAAGGAGCACTG                            |
| 3_4 rv.           | caggaaacagctatgacGGGAGCTCCCATGCTCTTC                             |
| 3_4 internal fw.1 | AGTGGGCGCTACCAGCTC                                               |
| 3_4 internal fw.2 | CAGACCAGCTGGTTGTGC                                               |
| 3_4 internal rv.  | GCACAACCAGCTGGTCTG                                               |
| 5 fw.             | gtaaaacgacggccagtTAAGGGCTCAGAGTGGCTGT                            |
| 5 rv.             | caggaaacagctatgacCCCAGCTTTGCTGTTAGGA                             |
| 6 fw.             | gtaaaacgacggccagtAGTGTGGAGAGTGGAATGACG                           |
| 6 rv.             | caggaaacagctatgacCCAGGTGTGATTCCGGAT                              |
| 7 fw.             | gtaaaacgacggccagtGAGCTACCATGTCTGTTGTTCC                          |
| 7 rv.             | caggaaacagctatgacCTATAATCTGGGAGTGGCACC                           |
| 8_9_10 fw.        | gtaaaacgacggccagtGCAGACTCCATGAGTGACTGC                           |
| 8_9_10 rv.        | caggaaacagctatgacCTGAGGGTGTGGCAAGGA                              |
| 11 fw.            | gtaaaacgacggccagtGACATATTGTCCTTGGGTGACC                          |
| 11 rv.            | caggaaacagctatgacCTCCTGGCACTTCCAGTGTC                            |

Table S4. Sequences of Primers Used for RT-PCR Analyses of *ROGDI*

|         | <b>RT-PCR Sequencing</b> | <b>Quantitative RT-PCR</b> |
|---------|--------------------------|----------------------------|
| Forward | GAAGCTGCAGCAGATCCAG      | CCAAGCAAGAGAACTTCATCC      |
| Reverse | GAGAGCCCCACTCGAACATG     | GCATCTTCAGGTTACATCC        |
